# Supplementary material
Source: publisher site journal article supplement (https://www.spandidos-publications.com/4307/downloadSupplementary)
Supplement: Supplementary file 2 [file downloadSupplementary]

## Sheet: Supplementary File 12
Table SXV. The enriched number of KEGG pathways in the siDEK condition.
##Databases: KEGG PATHWAY
#fg	269
#bg	7057
##Statistical test method: hypergeometric test
##FDR correction method: Benjamini and Hochberg
#Term	Database	ID	Input number	Background number	P-value	Corrected P-value	Input	Hyperlink
p53 signaling pathway	KEGG PATHWAY	hsa04115	10	69	0.000254818	0.0528539	GADD45A|CDKN1A|CASP8|RRM2B|BAX|DDB2|ATR|BBC3|TSC2|CHEK1	http://www.genome.jp/kegg-bin/show_pathway?hsa04115/hsa:1647%09red/hsa:1026%09red/hsa:1643%09red/hsa:1111%09red/hsa:50484%09red/hsa:7249%09red/hsa:581%09red/hsa:27113%09red/hsa:841%09red/hsa:545%09red
Viral carcinogenesis	KEGG PATHWAY	hsa05203	18	205	0.000785466	0.0528539	IRF3|ACTN1|CHD4|HDAC6|GTF2H2C|HRAS|RAC1|CASP8|HDAC11|CREB5|IKBKG|BAX|SP100|GSN|RHOA|PKM|CDKN1A|CHEK1	http://www.genome.jp/kegg-bin/show_pathway?hsa05203/hsa:2934%09red/hsa:1026%09red/hsa:9586%09red/hsa:8517%09red/hsa:728340%09red/hsa:1111%09red/hsa:10013%09red/hsa:79885%09red/hsa:1108%09red/hsa:581%09red/hsa:3661%09red/hsa:6672%09red/hsa:87%09red/hsa:841%09red/hsa:5879%09red/hsa:3265%09red/hsa:5315%09red/hsa:387%09red
Cell cycle	KEGG PATHWAY	hsa04110	13	124	0.000834887	0.0528539	E2F5|BUB3|CDC27|GADD45A|CDKN1A|STAG1|ANAPC11|ANAPC10|ANAPC13|PRKDC|ATR|ANAPC4|CHEK1	http://www.genome.jp/kegg-bin/show_pathway?hsa04110/hsa:1647%09red/hsa:1026%09red/hsa:996%09red/hsa:5591%09red/hsa:1111%09red/hsa:10393%09red/hsa:9184%09red/hsa:25847%09red/hsa:1875%09red/hsa:29945%09red/hsa:51529%09red/hsa:545%09red/hsa:10274%09red
Longevity regulating pathway	KEGG PATHWAY	hsa04211	11	94	0.000835635	0.0528539	EHMT1|EIF4E2|CAMKK2|HRAS|STK11|BAX|PPARG|AKT1S1|AKT1|TSC2|CREB5	http://www.genome.jp/kegg-bin/show_pathway?hsa04211/hsa:9586%09red/hsa:10645%09red/hsa:79813%09red/hsa:7249%09red/hsa:581%09red/hsa:6794%09red/hsa:9470%09red/hsa:3265%09red/hsa:207%09red/hsa:5468%09red/hsa:84335%09red
ErbB signaling pathway	KEGG PATHWAY	hsa04012	10	88	0.00179089	0.0774685	CBLC|PTK2|NCK2|SHC3|CAMK2D|HRAS|PAK1|AKT1|MAPK8|CDKN1A	http://www.genome.jp/kegg-bin/show_pathway?hsa04012/hsa:1026%09red/hsa:817%09red/hsa:23624%09red/hsa:5747%09red/hsa:5599%09red/hsa:53358%09red/hsa:5058%09red/hsa:3265%09red/hsa:8440%09red/hsa:207%09red
Focal adhesion	KEGG PATHWAY	hsa04510	17	203	0.0018372	0.0774685	MAPK8|PGF|ACTN1|LAMA3|SHC3|ITGB6|HRAS|RAC1|LAMB3|RAP1B|AKT1|PTK2|COL4A2|LAMC2|RHOA|PAK1|MYL9	http://www.genome.jp/kegg-bin/show_pathway?hsa04510/hsa:3918%09red/hsa:1284%09red/hsa:5747%09red/hsa:5228%09red/hsa:5908%09red/hsa:3914%09red/hsa:5058%09red/hsa:5599%09red/hsa:53358%09red/hsa:3694%09red/hsa:87%09red/hsa:5879%09red/hsa:3265%09red/hsa:207%09red/hsa:387%09red/hsa:10398%09red/hsa:3909%09red
Apoptosis	KEGG PATHWAY	hsa04210	13	140	0.00253941	0.0917815	GADD45A|HRAS|CTSC|DFFA|CASP8|AKT1|IKBKG|BAX|SPTAN1|BBC3|MAPK8|BIRC5|MCL1	http://www.genome.jp/kegg-bin/show_pathway?hsa04210/hsa:1647%09red/hsa:8517%09red/hsa:6709%09red/hsa:4170%09red/hsa:207%09red/hsa:1075%09red/hsa:5599%09red/hsa:581%09red/hsa:27113%09red/hsa:841%09red/hsa:3265%09red/hsa:332%09red/hsa:1676%09red
Neurotrophin signaling pathway	KEGG PATHWAY	hsa04722	11	120	0.00587497	0.185796	CALM3|RAC1|CAMK2D|HRAS|SHC3|RAP1B|BAX|AKT1|SH2B1|RHOA|MAPK8	http://www.genome.jp/kegg-bin/show_pathway?hsa04722/hsa:5908%09red/hsa:808%09red/hsa:581%09red/hsa:5599%09red/hsa:53358%09red/hsa:25970%09red/hsa:5879%09red/hsa:3265%09red/hsa:817%09red/hsa:207%09red/hsa:387%09red
Apoptosis - multiple species	KEGG PATHWAY	hsa04215	5	33	0.00766531	0.215043	BIRC5|BBC3|MAPK8|BAX|CASP8	http://www.genome.jp/kegg-bin/show_pathway?hsa04215/hsa:27113%09red/hsa:841%09red/hsa:581%09red/hsa:5599%09red/hsa:332%09red
Colorectal cancer	KEGG PATHWAY	hsa05210	7	62	0.00886023	0.215043	RALGDS|RAC1|BIRC5|BAX|AKT1|RHOA|MAPK8	http://www.genome.jp/kegg-bin/show_pathway?hsa05210/hsa:5900%09red/hsa:581%09red/hsa:5599%09red/hsa:5879%09red/hsa:332%09red/hsa:207%09red/hsa:387%09red
Bacterial invasion of epithelial cells	KEGG PATHWAY	hsa05100	8	78	0.00934971	0.215043	CBLC|PTK2|SHC3|RAC1|DNM1|SEPT8|RHOA|SEPT2	http://www.genome.jp/kegg-bin/show_pathway?hsa05100/hsa:23624%09red/hsa:5747%09red/hsa:23176%09red/hsa:53358%09red/hsa:1759%09red/hsa:5879%09red/hsa:387%09red/hsa:4735%09red
FoxO signaling pathway	KEGG PATHWAY	hsa04068	11	134	0.0130483	0.236068	PCK2|GADD45A|HRAS|STK11|PLK4|AKT1|ATG12|CSNK1E|STK4|MAPK8|CDKN1A	http://www.genome.jp/kegg-bin/show_pathway?hsa04068/hsa:1647%09red/hsa:1026%09red/hsa:3265%09red/hsa:9140%09red/hsa:5106%09red/hsa:6794%09red/hsa:10733%09red/hsa:5599%09red/hsa:1454%09red/hsa:207%09red/hsa:6789%09red
Ubiquitin mediated proteolysis	KEGG PATHWAY	hsa04120	11	137	0.0152106	0.236068	UBE2I|CBLC|CDC27|ANAPC11|UBE2D3|ANAPC13|ANAPC10|UBA6|DDB2|PML|ANAPC4	http://www.genome.jp/kegg-bin/show_pathway?hsa04120/hsa:55236%09red/hsa:996%09red/hsa:10393%09red/hsa:5371%09red/hsa:23624%09red/hsa:25847%09red/hsa:7323%09red/hsa:29945%09red/hsa:51529%09red/hsa:1643%09red/hsa:7329%09red
Purine metabolism	KEGG PATHWAY	hsa00230	13	175	0.0159796	0.236068	NME6|POLR1D|AK2|NT5C3B|GUK1|POLE|RRM2B|PFAS|CANT1|DGUOK|GMPR2|POLR3H|PKM	http://www.genome.jp/kegg-bin/show_pathway?hsa00230/hsa:2987%09red/hsa:51082%09red/hsa:171568%09red/hsa:5426%09red/hsa:50484%09red/hsa:124583%09red/hsa:115024%09red/hsa:1716%09red/hsa:10201%09red/hsa:51292%09red/hsa:5315%09red/hsa:5198%09red/hsa:204%09red
Pathways in cancer	KEGG PATHWAY	hsa05200	24	397	0.0162769	0.236068	PTK2|HRAS|BAX|AKT1|IKBKG|LAMB3|BIRC5|PGF|JUP|PML|MAPK8|CDKN1A|CBLC|PLCB1|LAMA3|RALGDS|RAC1|PPARG|STK4|COL4A2|LAMC2|RHOA|TFG|CASP8	http://www.genome.jp/kegg-bin/show_pathway?hsa05200/hsa:3918%09red/hsa:3728%09red/hsa:23624%09red/hsa:23236%09red/hsa:8517%09red/hsa:841%09red/hsa:332%09red/hsa:5900%09red/hsa:5747%09red/hsa:387%09red/hsa:6789%09red/hsa:10342%09red/hsa:5228%09red/hsa:5371%09red/hsa:581%09red/hsa:5599%09red/hsa:3914%09red/hsa:5879%09red/hsa:207%09red/hsa:3909%09red/hsa:1026%09red/hsa:1284%09red/hsa:3265%09red/hsa:…
Adipocytokine signaling pathway	KEGG PATHWAY	hsa04920	7	70	0.0167141	0.236068	PCK2|AKT1|STK11|ACSL4|CAMKK2|IKBKG|MAPK8	http://www.genome.jp/kegg-bin/show_pathway?hsa04920/hsa:8517%09red/hsa:10645%09red/hsa:5599%09red/hsa:6794%09red/hsa:5106%09red/hsa:207%09red/hsa:2182%09red
RIG-I-like receptor signaling pathway	KEGG PATHWAY	hsa04622	7	70	0.0167141	0.236068	IRF3|OTUD5|MAP3K7|CASP8|ATG12|IKBKG|MAPK8	http://www.genome.jp/kegg-bin/show_pathway?hsa04622/hsa:9140%09red/hsa:8517%09red/hsa:6885%09red/hsa:3661%09red/hsa:55593%09red/hsa:5599%09red/hsa:841%09red
Insulin signaling pathway	KEGG PATHWAY	hsa04910	11	139	0.0167953	0.236068	PCK2|CBLC|PPP1R3E|EIF4E2|CALM3|SOCS2|HRAS|SHC3|AKT1|MAPK8|TSC2	http://www.genome.jp/kegg-bin/show_pathway?hsa04910/hsa:808%09red/hsa:8835%09red/hsa:7249%09red/hsa:5106%09red/hsa:53358%09red/hsa:9470%09red/hsa:5599%09red/hsa:3265%09red/hsa:23624%09red/hsa:207%09red/hsa:90673%09red
Pyrimidine metabolism	KEGG PATHWAY	hsa00240	9	105	0.0183463	0.240255	NME6|UCK1|NT5C3B|POLE|RRM2B|CANT1|POLR1D|TXNRD2|POLR3H	http://www.genome.jp/kegg-bin/show_pathway?hsa00240/hsa:83549%09red/hsa:51082%09red/hsa:171568%09red/hsa:5426%09red/hsa:50484%09red/hsa:115024%09red/hsa:10587%09red/hsa:10201%09red/hsa:124583%09red
Vitamin B6 metabolism	KEGG PATHWAY	hsa00750	2	6	0.0196164	0.240255	PHOSPHO2|PNPO	http://www.genome.jp/kegg-bin/show_pathway?hsa00750/hsa:55163%09red/hsa:493911%09red
HTLV-I infection	KEGG PATHWAY	hsa05166	17	259	0.0199421	0.240255	XPO1|TCF3|BUB3|CDC27|HRAS|ANAPC11|ANAPC10|BAX|ANAPC4|AKT1|POLE|ATR|IKBKG|MAPK8|IL15RA|CDKN1A|CHEK1	http://www.genome.jp/kegg-bin/show_pathway?hsa05166/hsa:3601%09red/hsa:1026%09red/hsa:8517%09red/hsa:996%09red/hsa:1111%09red/hsa:5426%09red/hsa:581%09red/hsa:5599%09red/hsa:7514%09red/hsa:9184%09red/hsa:6929%09red/hsa:10393%09red/hsa:3265%09red/hsa:51529%09red/hsa:207%09red/hsa:545%09red/hsa:29945%09red
Hepatitis B	KEGG PATHWAY	hsa05161	11	146	0.0233242	0.259538	IRF3|HRAS|BAX|AKT1|CASP8|CDKN1A|DDB2|MAPK8|CREB5|BIRC5|IKBKG	http://www.genome.jp/kegg-bin/show_pathway?hsa05161/hsa:1026%09red/hsa:8517%09red/hsa:1643%09red/hsa:3661%09red/hsa:9586%09red/hsa:581%09red/hsa:5599%09red/hsa:841%09red/hsa:3265%09red/hsa:332%09red/hsa:207%09red
Platinum drug resistance	KEGG PATHWAY	hsa01524	7	75	0.0235944	0.259538	CDKN1A|GSTM4|BAX|AKT1|CASP8|BBC3|BIRC5	http://www.genome.jp/kegg-bin/show_pathway?hsa01524/hsa:1026%09red/hsa:2948%09red/hsa:581%09red/hsa:27113%09red/hsa:841%09red/hsa:332%09red/hsa:207%09red
Endocrine resistance	KEGG PATHWAY	hsa01522	8	97	0.0311707	0.313762	PTK2|SHC3|HRAS|BAX|AKT1|MAPK8|CDKN1A|NCOR1	http://www.genome.jp/kegg-bin/show_pathway?hsa01522/hsa:1026%09red/hsa:9611%09red/hsa:581%09red/hsa:5599%09red/hsa:53358%09red/hsa:5747%09red/hsa:3265%09red/hsa:207%09red
Synaptic vesicle cycle	KEGG PATHWAY	hsa04721	6	63	0.0320739	0.313762	AP2S1|ATP6V1F|STX2|DNM1|AP2A2|AP2B1	http://www.genome.jp/kegg-bin/show_pathway?hsa04721/hsa:1175%09red/hsa:9296%09red/hsa:2054%09red/hsa:1759%09red/hsa:163%09red/hsa:161%09red
Endocrine and other factor-regulated calcium reabsorption	KEGG PATHWAY	hsa04961	5	47	0.0322443	0.313762	PLCB1|AP2S1|DNM1|AP2B1|AP2A2	http://www.genome.jp/kegg-bin/show_pathway?hsa04961/hsa:1759%09red/hsa:161%09red/hsa:1175%09red/hsa:163%09red/hsa:23236%09red
Glioma	KEGG PATHWAY	hsa05214	6	65	0.0366364	0.334426	CALM3|SHC3|CAMK2D|HRAS|AKT1|CDKN1A	http://www.genome.jp/kegg-bin/show_pathway?hsa05214/hsa:1026%09red/hsa:808%09red/hsa:53358%09red/hsa:3265%09red/hsa:817%09red/hsa:207%09red
AGE-RAGE signaling pathway in diabetic complications	KEGG PATHWAY	hsa04933	8	101	0.0383334	0.334426	PLCB1|RAC1|HRAS|AGER|BAX|AKT1|COL4A2|MAPK8	http://www.genome.jp/kegg-bin/show_pathway?hsa04933/hsa:1284%09red/hsa:581%09red/hsa:5599%09red/hsa:23236%09red/hsa:5879%09red/hsa:3265%09red/hsa:207%09red/hsa:177%09red
Choline metabolism in cancer	KEGG PATHWAY	hsa05231	8	101	0.0383334	0.334426	SLC44A3|RALGDS|RAC1|HRAS|AKT1|MAPK8|TSC2|CHKA	http://www.genome.jp/kegg-bin/show_pathway?hsa05231/hsa:5900%09red/hsa:7249%09red/hsa:1119%09red/hsa:5599%09red/hsa:5879%09red/hsa:3265%09red/hsa:126969%09red/hsa:207%09red
Small cell lung cancer	KEGG PATHWAY	hsa05222	7	86	0.0450654	0.359871	LAMA3|AKT1|PTK2|COL4A2|LAMC2|LAMB3|IKBKG	http://www.genome.jp/kegg-bin/show_pathway?hsa05222/hsa:3918%09red/hsa:1284%09red/hsa:5747%09red/hsa:3914%09red/hsa:8517%09red/hsa:207%09red/hsa:3909%09red
T cell receptor signaling pathway	KEGG PATHWAY	hsa04660	8	105	0.0465254	0.359871	CBLC|NCK2|HRAS|MAP3K7|AKT1|IKBKG|RHOA|PAK1	http://www.genome.jp/kegg-bin/show_pathway?hsa04660/hsa:8517%09red/hsa:6885%09red/hsa:23624%09red/hsa:5058%09red/hsa:3265%09red/hsa:8440%09red/hsa:207%09red/hsa:387%09red
AMPK signaling pathway	KEGG PATHWAY	hsa04152	9	124	0.0467079	0.359871	PCK2|CAMKK2|CREB5|STK11|MAP3K7|PPARG|AKT1S1|AKT1|TSC2	http://www.genome.jp/kegg-bin/show_pathway?hsa04152/hsa:6885%09red/hsa:9586%09red/hsa:10645%09red/hsa:7249%09red/hsa:5106%09red/hsa:6794%09red/hsa:207%09red/hsa:5468%09red/hsa:84335%09red
Lysine degradation	KEGG PATHWAY	hsa00310	5	52	0.0469397	0.359871	SETD1B|EHMT1|DOT1L|KMT2C|SUV39H2	http://www.genome.jp/kegg-bin/show_pathway?hsa00310/hsa:58508%09red/hsa:79723%09red/hsa:79813%09red/hsa:23067%09red/hsa:84444%09red
Metabolic pathways	KEGG PATHWAY	hsa01100	58	1241	0.0505836	0.376401	PCK2|ATP6V1F|PI4KB|DHFR|PCCA|NADSYN1|P4HA2|POLE|POLR1D|PGS1|PYCR1|CHKA|POLR3H|ATP5D|NDUFV1|IDH3B|THTPA|DHRS4|AFMID|OXSM|NT5C3B|PLA2G6|PNPLA2|MPST|RRM2B|GBE1|PHOSPHO1|MRI1|MECR|B4GALT2|GAA|PKM|PLCB1|LAMA3|AK2|UXS1|UCK1|AGPAT3|NAT1|ABO|PIGP|ENO3|GUK1|PIGW|ALG11|XYLT1|ST6GALNAC3|PNPO|CYP1A1|NME6|PLD3|HYAL3|PHOSPHO2|ASNS|ACSL4|EBP|PFAS|DGUOK	http://www.genome.jp/kegg-bin/show_pathway?hsa01100/hsa:2987%09red/hsa:2632%09red/hsa:171568%09red/hsa:256435%09red/hsa:50484%09red/hsa:23236%09red/hsa:5106%09red/hsa:513%09red/hsa:57104%09red/hsa:55163%09red/hsa:440%09red/hsa:1543%09red/hsa:9489%09red/hsa:83549%09red/hsa:51082%09red/hsa:440138%09red/hsa:2027%09red/hsa:10901%09red/hsa:8704%09red/hsa:28%09red/hsa:51227%09red/hsa:1119%09red/hsa:115…
Ras signaling pathway	KEGG PATHWAY	hsa04014	14	228	0.0527337	0.381189	PGF|CALM3|SHC3|RAC1|HRAS|MAPK8|RAP1B|PLA2G6|AKT1|STK4|IKBKG|RHOA|PAK1|RALGDS	http://www.genome.jp/kegg-bin/show_pathway?hsa04014/hsa:5900%09red/hsa:5228%09red/hsa:8517%09red/hsa:5908%09red/hsa:808%09red/hsa:8398%09red/hsa:53358%09red/hsa:5058%09red/hsa:5599%09red/hsa:5879%09red/hsa:3265%09red/hsa:207%09red/hsa:387%09red/hsa:6789%09red
Chronic myeloid leukemia	KEGG PATHWAY	hsa05220	6	73	0.0589224	0.414093	CBLC|SHC3|HRAS|AKT1|IKBKG|CDKN1A	http://www.genome.jp/kegg-bin/show_pathway?hsa05220/hsa:1026%09red/hsa:8517%09red/hsa:23624%09red/hsa:53358%09red/hsa:3265%09red/hsa:207%09red
RNA transport	KEGG PATHWAY	hsa03013	11	172	0.0638011	0.421891	UBE2I|XPO1|EIF4E2|NCBP2|NUP133|NUP160|SNUPN|PAIP1|PRMT5|RPP14|NUP155	http://www.genome.jp/kegg-bin/show_pathway?hsa03013/hsa:11102%09red/hsa:9631%09red/hsa:10419%09red/hsa:10073%09red/hsa:22916%09red/hsa:55746%09red/hsa:9470%09red/hsa:10605%09red/hsa:23279%09red/hsa:7514%09red/hsa:7329%09red
Acute myeloid leukemia	KEGG PATHWAY	hsa05221	5	57	0.0650346	0.421891	PML|AKT1|JUP|HRAS|IKBKG	http://www.genome.jp/kegg-bin/show_pathway?hsa05221/hsa:5371%09red/hsa:8517%09red/hsa:207%09red/hsa:3265%09red/hsa:3728%09red
NOD-like receptor signaling pathway	KEGG PATHWAY	hsa04621	5	57	0.0650346	0.421891	MAPK8|CARD8|MAP3K7|CASP8|IKBKG	http://www.genome.jp/kegg-bin/show_pathway?hsa04621/hsa:22900%09red/hsa:8517%09red/hsa:841%09red/hsa:6885%09red/hsa:5599%09red
Glycosylphosphatidylinositol(GPI)-anchor biosynthesis	KEGG PATHWAY	hsa00563	3	25	0.0679102	0.429532	PIGP|PIGG|PIGW	http://www.genome.jp/kegg-bin/show_pathway?hsa00563/hsa:284098%09red/hsa:51227%09red/hsa:54872%09red
Oxytocin signaling pathway	KEGG PATHWAY	hsa04921	10	158	0.0791374	0.445459	PLCB1|CALM3|CAMK2D|HRAS|MYL6|CAMKK2|CDKN1A|RHOA|CACNB1|MYL9	http://www.genome.jp/kegg-bin/show_pathway?hsa04921/hsa:1026%09red/hsa:10645%09red/hsa:817%09red/hsa:782%09red/hsa:23236%09red/hsa:4637%09red/hsa:3265%09red/hsa:808%09red/hsa:387%09red/hsa:10398%09red
Inflammatory mediator regulation of TRP channels	KEGG PATHWAY	hsa04750	7	98	0.0795843	0.445459	PLCB1|CALM3|CAMK2D|ASIC3|PLA2G6|MAPK8|TRPV1	http://www.genome.jp/kegg-bin/show_pathway?hsa04750/hsa:9311%09red/hsa:7442%09red/hsa:817%09red/hsa:23236%09red/hsa:5599%09red/hsa:8398%09red/hsa:808%09red
Progesterone-mediated oocyte maturation	KEGG PATHWAY	hsa04914	7	98	0.0795843	0.445459	CDC27|ANAPC11|ANAPC10|ANAPC13|AKT1|MAPK8|ANAPC4	http://www.genome.jp/kegg-bin/show_pathway?hsa04914/hsa:996%09red/hsa:5599%09red/hsa:25847%09red/hsa:10393%09red/hsa:29945%09red/hsa:51529%09red/hsa:207%09red
Thyroid hormone signaling pathway	KEGG PATHWAY	hsa04919	8	118	0.0806822	0.445459	NCOA2|PLCB1|NCOA1|HRAS|AKT1|MED16|TSC2|NCOR1	http://www.genome.jp/kegg-bin/show_pathway?hsa04919/hsa:9611%09red/hsa:8648%09red/hsa:7249%09red/hsa:23236%09red/hsa:10499%09red/hsa:3265%09red/hsa:10025%09red/hsa:207%09red
Transcriptional misregulation in cancer	KEGG PATHWAY	hsa05202	11	180	0.0822077	0.445459	PTK2|TCF3|CDKN1A|HMGA2|BMP2K|PPARG|JUP|PML|DOT1L|HPGD|NCOR1	http://www.genome.jp/kegg-bin/show_pathway?hsa05202/hsa:1026%09red/hsa:3728%09red/hsa:9611%09red/hsa:55589%09red/hsa:5371%09red/hsa:5747%09red/hsa:6929%09red/hsa:8091%09red/hsa:3248%09red/hsa:5468%09red/hsa:84444%09red
Toxoplasmosis	KEGG PATHWAY	hsa05145	8	119	0.0837991	0.445459	LAMA3|MAP3K7|CASP8|AKT1|IKBKG|LAMC2|MAPK8|LAMB3	http://www.genome.jp/kegg-bin/show_pathway?hsa05145/hsa:3918%09red/hsa:8517%09red/hsa:6885%09red/hsa:3914%09red/hsa:5599%09red/hsa:841%09red/hsa:207%09red/hsa:3909%09red
Non-homologous end-joining	KEGG PATHWAY	hsa03450	2	13	0.0856431	0.445459	MRE11A|PRKDC	http://www.genome.jp/kegg-bin/show_pathway?hsa03450/hsa:4361%09red/hsa:5591%09red
Fatty acid biosynthesis	KEGG PATHWAY	hsa00061	2	13	0.0856431	0.445459	OXSM|ACSL4	http://www.genome.jp/kegg-bin/show_pathway?hsa00061/hsa:54995%09red/hsa:2182%09red
Amoebiasis	KEGG PATHWAY	hsa05146	7	100	0.0865093	0.445459	PLCB1|ACTN1|LAMA3|PTK2|COL4A2|LAMC2|LAMB3	http://www.genome.jp/kegg-bin/show_pathway?hsa05146/hsa:3918%09red/hsa:1284%09red/hsa:3914%09red/hsa:5747%09red/hsa:23236%09red/hsa:87%09red/hsa:3909%09red
Glucagon signaling pathway	KEGG PATHWAY	hsa04922	7	102	0.0937674	0.445459	PCK2|PLCB1|CALM3|CAMK2D|CREB5|AKT1|PKM	http://www.genome.jp/kegg-bin/show_pathway?hsa04922/hsa:9586%09red/hsa:817%09red/hsa:23236%09red/hsa:5106%09red/hsa:808%09red/hsa:5315%09red/hsa:207%09red
Peroxisome	KEGG PATHWAY	hsa04146	6	83	0.096092	0.445459	PEX26|DHRS4|ACSL4|PXMP2|PRDX5|PEX16	http://www.genome.jp/kegg-bin/show_pathway?hsa04146/hsa:5827%09red/hsa:10901%09red/hsa:55670%09red/hsa:25824%09red/hsa:9409%09red/hsa:2182%09red
Thyroid cancer	KEGG PATHWAY	hsa05216	3	29	0.0967135	0.445459	PPARG|HRAS|TFG	http://www.genome.jp/kegg-bin/show_pathway?hsa05216/hsa:10342%09red/hsa:5468%09red/hsa:3265%09red
Glycosphingolipid biosynthesis - globo series	KEGG PATHWAY	hsa00603	2	14	0.0974852	0.445459	GLA|NAGA	http://www.genome.jp/kegg-bin/show_pathway?hsa00603/hsa:4668%09red/hsa:2717%09red
Phospholipase D signaling pathway	KEGG PATHWAY	hsa04072	9	144	0.0983844	0.445459	PLCB1|RALGDS|SHC3|HRAS|AKT1|AGPAT3|DNM1|RHOA|TSC2	http://www.genome.jp/kegg-bin/show_pathway?hsa04072/hsa:5900%09red/hsa:56894%09red/hsa:7249%09red/hsa:23236%09red/hsa:53358%09red/hsa:1759%09red/hsa:3265%09red/hsa:207%09red/hsa:387%09red
PI3K-Akt signaling pathway	KEGG PATHWAY	hsa04151	18	341	0.0997337	0.445459	PCK2|PGF|LAMA3|ITGB6|HRAS|STK11|IKBKG|PTK2|AKT1|EIF4E2|CREB5|COL4A2|RAC1|LAMC2|LAMB3|TSC2|CDKN1A|MCL1	http://www.genome.jp/kegg-bin/show_pathway?hsa04151/hsa:1026%09red/hsa:1284%09red/hsa:9586%09red/hsa:4170%09red/hsa:3918%09red/hsa:7249%09red/hsa:5747%09red/hsa:5106%09red/hsa:3914%09red/hsa:6794%09red/hsa:3694%09red/hsa:8517%09red/hsa:9470%09red/hsa:5879%09red/hsa:3265%09red/hsa:5228%09red/hsa:207%09red/hsa:3909%09red
Nucleotide excision repair	KEGG PATHWAY	hsa03420	4	47	0.102896	0.445459	DDB2|RFC4|POLE|GTF2H2C	http://www.genome.jp/kegg-bin/show_pathway?hsa03420/hsa:728340%09red/hsa:5984%09red/hsa:1643%09red/hsa:5426%09red
Pancreatic cancer	KEGG PATHWAY	hsa05212	5	66	0.106058	0.445459	AKT1|MAPK8|IKBKG|RALGDS|RAC1	http://www.genome.jp/kegg-bin/show_pathway?hsa05212/hsa:5900%09red/hsa:8517%09red/hsa:207%09red/hsa:5879%09red/hsa:5599%09red
Long-term potentiation	KEGG PATHWAY	hsa04720	5	66	0.106058	0.445459	CAMK2D|PLCB1|HRAS|CALM3|RAP1B	http://www.genome.jp/kegg-bin/show_pathway?hsa04720/hsa:5908%09red/hsa:817%09red/hsa:23236%09red/hsa:3265%09red/hsa:808%09red
MAPK signaling pathway	KEGG PATHWAY	hsa04010	14	255	0.107696	0.445459	AKT1|PPM1A|RAC1|GADD45A|HRAS|MAP3K7|PAK1|RAP1B|MAP3K13|STK4|IKBKG|MAPK8|CACNB1|TAOK2	http://www.genome.jp/kegg-bin/show_pathway?hsa04010/hsa:1647%09red/hsa:8517%09red/hsa:6885%09red/hsa:5908%09red/hsa:207%09red/hsa:782%09red/hsa:5599%09red/hsa:5058%09red/hsa:9344%09red/hsa:6789%09red/hsa:3265%09red/hsa:9175%09red/hsa:5494%09red/hsa:5879%09red
Toll-like receptor signaling pathway	KEGG PATHWAY	hsa04620	7	106	0.109269	0.445459	IRF3|RAC1|MAP3K7|CASP8|AKT1|IKBKG|MAPK8	http://www.genome.jp/kegg-bin/show_pathway?hsa04620/hsa:8517%09red/hsa:6885%09red/hsa:3661%09red/hsa:5599%09red/hsa:841%09red/hsa:5879%09red/hsa:207%09red
Central carbon metabolism in cancer	KEGG PATHWAY	hsa05230	5	67	0.111256	0.445459	AKT1|HRAS|SLC1A5|SCO2|PKM	http://www.genome.jp/kegg-bin/show_pathway?hsa05230/hsa:5315%09red/hsa:9997%09red/hsa:6510%09red/hsa:207%09red/hsa:3265%09red
Renal cell carcinoma	KEGG PATHWAY	hsa05211	5	67	0.111256	0.445459	AKT1|HRAS|RAP1B|PAK1|RAC1	http://www.genome.jp/kegg-bin/show_pathway?hsa05211/hsa:5908%09red/hsa:5058%09red/hsa:207%09red/hsa:5879%09red/hsa:3265%09red
Circadian rhythm	KEGG PATHWAY	hsa04710	3	31	0.112685	0.445459	ARNTL|PER1|CSNK1E	http://www.genome.jp/kegg-bin/show_pathway?hsa04710/hsa:406%09red/hsa:1454%09red/hsa:5187%09red
Galactose metabolism	KEGG PATHWAY	hsa00052	3	31	0.112685	0.445459	GLA|B4GALT2|GAA	http://www.genome.jp/kegg-bin/show_pathway?hsa00052/hsa:8704%09red/hsa:2548%09red/hsa:2717%09red
Epithelial cell signaling in Helicobacter pylori infection	KEGG PATHWAY	hsa05120	5	68	0.116576	0.45375	MAPK8|ATP6V1F|PAK1|RAC1|IKBKG	http://www.genome.jp/kegg-bin/show_pathway?hsa05120/hsa:9296%09red/hsa:8517%09red/hsa:5058%09red/hsa:5599%09red/hsa:5879%09red
Huntington's disease	KEGG PATHWAY	hsa05016	11	193	0.118528	0.454357	PLCB1|NDUFV1|CREB5|AP2S1|CASP8|PPARG|BAX|AP2A2|BBC3|AP2B1|ATP5D	http://www.genome.jp/kegg-bin/show_pathway?hsa05016/hsa:1175%09red/hsa:9586%09red/hsa:23236%09red/hsa:581%09red/hsa:4723%09red/hsa:27113%09red/hsa:841%09red/hsa:163%09red/hsa:161%09red/hsa:513%09red/hsa:5468%09red
Endocytosis	KEGG PATHWAY	hsa04144	14	260	0.120687	0.455728	CBLC|AP2S1|RUFY1|HRAS|EPN1|PDCD6IP|IST1|FAM21C|FAM21A|AP2A2|PML|DNM1|RHOA|AP2B1	http://www.genome.jp/kegg-bin/show_pathway?hsa04144/hsa:10015%09red/hsa:80230%09red/hsa:29924%09red/hsa:5371%09red/hsa:253725%09red/hsa:23624%09red/hsa:9798%09red/hsa:1759%09red/hsa:387680%09red/hsa:163%09red/hsa:3265%09red/hsa:161%09red/hsa:1175%09red/hsa:387%09red
mTOR signaling pathway	KEGG PATHWAY	hsa04150	9	154	0.133177	0.488503	ATP6V1F|HRAS|STK11|AKT1|WDR24|EIF4E2|AKT1S1|RHOA|TSC2	http://www.genome.jp/kegg-bin/show_pathway?hsa04150/hsa:207%09red/hsa:9296%09red/hsa:7249%09red/hsa:6794%09red/hsa:84219%09red/hsa:9470%09red/hsa:3265%09red/hsa:84335%09red/hsa:387%09red
Axon guidance	KEGG PATHWAY	hsa04360	10	176	0.134369	0.488503	PTK2|NCK2|RAC1|CAMK2D|HRAS|BMPR2|SSH1|RHOA|PAK1|SEMA4G	http://www.genome.jp/kegg-bin/show_pathway?hsa04360/hsa:57715%09red/hsa:659%09red/hsa:5747%09red/hsa:5058%09red/hsa:5879%09red/hsa:3265%09red/hsa:817%09red/hsa:8440%09red/hsa:54434%09red/hsa:387%09red
cAMP signaling pathway	KEGG PATHWAY	hsa04024	11	199	0.137936	0.488503	CALM3|RAC1|CAMK2D|CREB5|MAPK8|RAP1B|ATP2B4|AKT1|RHOA|PAK1|MYL9	http://www.genome.jp/kegg-bin/show_pathway?hsa04024/hsa:9586%09red/hsa:5908%09red/hsa:817%09red/hsa:5599%09red/hsa:493%09red/hsa:5058%09red/hsa:5879%09red/hsa:808%09red/hsa:207%09red/hsa:387%09red/hsa:10398%09red
Spliceosome	KEGG PATHWAY	hsa03040	8	134	0.138819	0.488503	SNRPD2|NCBP2|LSM7|PRPF40A|U2AF1L4|ISY1-RAB43|TXNL4A|TRA2B	http://www.genome.jp/kegg-bin/show_pathway?hsa03040/hsa:10907%09red/hsa:6633%09red/hsa:51690%09red/hsa:6434%09red/hsa:22916%09red/hsa:55660%09red/hsa:100534599%09red/hsa:199746%09red
Prolactin signaling pathway	KEGG PATHWAY	hsa04917	5	72	0.139021	0.488503	AKT1|HRAS|SHC3|MAPK8|SOCS2	http://www.genome.jp/kegg-bin/show_pathway?hsa04917/hsa:8835%09red/hsa:207%09red/hsa:5599%09red/hsa:3265%09red/hsa:53358%09red
Epstein-Barr virus infection	KEGG PATHWAY	hsa05169	11	201	0.144764	0.501717	XPO1|IRF3|PTMA|CDKN1A|MAP3K7|AKT1|POLR1D|IKBKG|MAPK8|NCOR2|POLR3H	http://www.genome.jp/kegg-bin/show_pathway?hsa05169/hsa:1026%09red/hsa:9612%09red/hsa:8517%09red/hsa:6885%09red/hsa:3661%09red/hsa:171568%09red/hsa:5757%09red/hsa:5599%09red/hsa:51082%09red/hsa:207%09red/hsa:7514%09red
Adherens junction	KEGG PATHWAY	hsa04520	5	74	0.150906	0.515934	BAIAP2|ACTN1|RAC1|RHOA|MAP3K7	http://www.genome.jp/kegg-bin/show_pathway?hsa04520/hsa:5879%09red/hsa:87%09red/hsa:387%09red/hsa:10458%09red/hsa:6885%09red
Glycerophospholipid metabolism	KEGG PATHWAY	hsa00564	6	95	0.153712	0.518521	PLD3|PLA2G6|AGPAT3|PHOSPHO1|PGS1|CHKA	http://www.genome.jp/kegg-bin/show_pathway?hsa00564/hsa:56894%09red/hsa:23646%09red/hsa:1119%09red/hsa:162466%09red/hsa:9489%09red/hsa:8398%09red
Fanconi anemia pathway	KEGG PATHWAY	hsa03460	4	55	0.156625	0.521396	SLX1B|ATR|APITD1-CORT|FAAP100	http://www.genome.jp/kegg-bin/show_pathway?hsa03460/hsa:79008%09red/hsa:545%09red/hsa:100526739%09red/hsa:80233%09red
Tight junction	KEGG PATHWAY	hsa04530	8	139	0.160429	0.527125	EPB41L1|ACTN1|LLGL2|SPTAN1|HRAS|AKT1|RHOA|MYL9	http://www.genome.jp/kegg-bin/show_pathway?hsa04530/hsa:3993%09red/hsa:2036%09red/hsa:3265%09red/hsa:87%09red/hsa:6709%09red/hsa:207%09red/hsa:387%09red/hsa:10398%09red
Herpes simplex infection	KEGG PATHWAY	hsa05168	10	186	0.172116	0.544975	IRF3|ARNTL|MAP3K7|CASP8|PER1|IKBKG|PML|MED8|MAPK8|SP100	http://www.genome.jp/kegg-bin/show_pathway?hsa05168/hsa:8517%09red/hsa:6885%09red/hsa:3661%09red/hsa:5371%09red/hsa:406%09red/hsa:5599%09red/hsa:841%09red/hsa:112950%09red/hsa:5187%09red/hsa:6672%09red
Estrogen signaling pathway	KEGG PATHWAY	hsa04915	6	99	0.175715	0.544975	PLCB1|CALM3|SHC3|HRAS|AKT1|CREB5	http://www.genome.jp/kegg-bin/show_pathway?hsa04915/hsa:9586%09red/hsa:808%09red/hsa:23236%09red/hsa:53358%09red/hsa:3265%09red/hsa:207%09red
Chemokine signaling pathway	KEGG PATHWAY	hsa04062	10	187	0.176146	0.544975	PLCB1|PTK2|RAC1|HRAS|SHC3|RAP1B|AKT1|IKBKG|RHOA|PAK1	http://www.genome.jp/kegg-bin/show_pathway?hsa04062/hsa:8517%09red/hsa:5747%09red/hsa:5908%09red/hsa:23236%09red/hsa:53358%09red/hsa:5058%09red/hsa:5879%09red/hsa:3265%09red/hsa:207%09red/hsa:387%09red
Caffeine metabolism	KEGG PATHWAY	hsa00232	1	5	0.176651	0.544975	NAT1	http://www.genome.jp/kegg-bin/show_pathway?hsa00232/hsa:9%09red
Sphingolipid signaling pathway	KEGG PATHWAY	hsa04071	7	121	0.178322	0.544975	PLCB1|RAC1|HRAS|BAX|AKT1|MAPK8|RHOA	http://www.genome.jp/kegg-bin/show_pathway?hsa04071/hsa:581%09red/hsa:5599%09red/hsa:23236%09red/hsa:5879%09red/hsa:3265%09red/hsa:207%09red/hsa:387%09red
Wnt signaling pathway	KEGG PATHWAY	hsa04310	8	143	0.178786	0.544975	PLCB1|RAC1|CAMK2D|MAP3K7|CSNK1E|CTNNBIP1|RHOA|MAPK8	http://www.genome.jp/kegg-bin/show_pathway?hsa04310/hsa:6885%09red/hsa:56998%09red/hsa:817%09red/hsa:23236%09red/hsa:5599%09red/hsa:5879%09red/hsa:1454%09red/hsa:387%09red
Oocyte meiosis	KEGG PATHWAY	hsa04114	7	123	0.188701	0.567182	CALM3|CDC27|ANAPC11|ANAPC10|ANAPC13|CAMK2D|ANAPC4	http://www.genome.jp/kegg-bin/show_pathway?hsa04114/hsa:996%09red/hsa:817%09red/hsa:808%09red/hsa:25847%09red/hsa:10393%09red/hsa:29945%09red/hsa:51529%09red
Regulation of autophagy	KEGG PATHWAY	hsa04140	3	40	0.19461	0.567182	ATG4B|ATG12|ATG4D	http://www.genome.jp/kegg-bin/show_pathway?hsa04140/hsa:9140%09red/hsa:84971%09red/hsa:23192%09red
Pyruvate metabolism	KEGG PATHWAY	hsa00620	3	40	0.19461	0.567182	PCK2|ACYP1|PKM	http://www.genome.jp/kegg-bin/show_pathway?hsa00620/hsa:5315%09red/hsa:97%09red/hsa:5106%09red
EGFR tyrosine kinase inhibitor resistance	KEGG PATHWAY	hsa01521	5	81	0.195585	0.567182	AKT1|HRAS|EIF4E2|BAX|SHC3	http://www.genome.jp/kegg-bin/show_pathway?hsa01521/hsa:207%09red/hsa:9470%09red/hsa:581%09red/hsa:3265%09red/hsa:53358%09red
Regulation of actin cytoskeleton	KEGG PATHWAY	hsa04810	11	215	0.197281	0.567182	ACTN1|PTK2|ITGB6|HRAS|RAC1|SSH1|BAIAP2|RHOA|GSN|PAK1|MYL9	http://www.genome.jp/kegg-bin/show_pathway?hsa04810/hsa:2934%09red/hsa:5058%09red/hsa:5747%09red/hsa:3694%09red/hsa:87%09red/hsa:5879%09red/hsa:3265%09red/hsa:54434%09red/hsa:387%09red/hsa:10398%09red/hsa:10458%09red
ECM-receptor interaction	KEGG PATHWAY	hsa04512	5	82	0.202317	0.569002	LAMC2|LAMB3|LAMA3|COL4A2|ITGB6	http://www.genome.jp/kegg-bin/show_pathway?hsa04512/hsa:3918%09red/hsa:3694%09red/hsa:1284%09red/hsa:3914%09red/hsa:3909%09red
VEGF signaling pathway	KEGG PATHWAY	hsa04370	4	61	0.202412	0.569002	AKT1|HRAS|PTK2|RAC1	http://www.genome.jp/kegg-bin/show_pathway?hsa04370/hsa:207%09red/hsa:5879%09red/hsa:3265%09red/hsa:5747%09red
Cytosolic DNA-sensing pathway	KEGG PATHWAY	hsa04623	4	64	0.226649	0.623829	IRF3|POLR1D|IKBKG|POLR3H	http://www.genome.jp/kegg-bin/show_pathway?hsa04623/hsa:171568%09red/hsa:51082%09red/hsa:8517%09red/hsa:3661%09red
Dopaminergic synapse	KEGG PATHWAY	hsa04728	7	130	0.226847	0.623829	ARNTL|PLCB1|CALM3|CAMK2D|CREB5|AKT1|MAPK8	http://www.genome.jp/kegg-bin/show_pathway?hsa04728/hsa:9586%09red/hsa:817%09red/hsa:406%09red/hsa:23236%09red/hsa:5599%09red/hsa:808%09red/hsa:207%09red
Shigellosis	KEGG PATHWAY	hsa05131	4	65	0.23489	0.639001	U2AF1L4|MAPK8|IKBKG|RAC1	http://www.genome.jp/kegg-bin/show_pathway?hsa05131/hsa:199746%09red/hsa:8517%09red/hsa:5879%09red/hsa:5599%09red
TNF signaling pathway	KEGG PATHWAY	hsa04668	6	110	0.242006	0.649713	CREB5|MAP3K7|CASP8|AKT1|IKBKG|MAPK8	http://www.genome.jp/kegg-bin/show_pathway?hsa04668/hsa:8517%09red/hsa:6885%09red/hsa:9586%09red/hsa:5599%09red/hsa:841%09red/hsa:207%09red
Hepatitis C	KEGG PATHWAY	hsa05160	7	133	0.243963	0.649713	IRF3|HRAS|PSME3|AKT1|IKBKG|MAPK8|CDKN1A	http://www.genome.jp/kegg-bin/show_pathway?hsa05160/hsa:1026%09red/hsa:8517%09red/hsa:3661%09red/hsa:5599%09red/hsa:10197%09red/hsa:3265%09red/hsa:207%09red
Prostate cancer	KEGG PATHWAY	hsa05215	5	89	0.251415	0.662582	AKT1|HRAS|CREB5|CDKN1A|IKBKG	http://www.genome.jp/kegg-bin/show_pathway?hsa05215/hsa:1026%09red/hsa:8517%09red/hsa:207%09red/hsa:9586%09red/hsa:3265%09red
Fc epsilon RI signaling pathway	KEGG PATHWAY	hsa04664	4	68	0.260016	0.673323	AKT1|HRAS|MAPK8|RAC1	http://www.genome.jp/kegg-bin/show_pathway?hsa04664/hsa:207%09red/hsa:5599%09red/hsa:5879%09red/hsa:3265%09red
Glycosphingolipid biosynthesis - lacto and neolacto series	KEGG PATHWAY	hsa00601	2	26	0.260813	0.673323	B4GALT2|ABO	http://www.genome.jp/kegg-bin/show_pathway?hsa00601/hsa:8704%09red/hsa:28%09red
GnRH signaling pathway	KEGG PATHWAY	hsa04912	5	91	0.265973	0.67971	CAMK2D|PLCB1|HRAS|MAPK8|CALM3	http://www.genome.jp/kegg-bin/show_pathway?hsa04912/hsa:817%09red/hsa:5599%09red/hsa:23236%09red/hsa:3265%09red/hsa:808%09red
Notch signaling pathway	KEGG PATHWAY	hsa04330	3	48	0.276207	0.684994	APH1A|NCOR2|DTX2	http://www.genome.jp/kegg-bin/show_pathway?hsa04330/hsa:9612%09red/hsa:113878%09red/hsa:51107%09red
Fatty acid metabolism	KEGG PATHWAY	hsa01212	3	48	0.276207	0.684994	MECR|OXSM|ACSL4	http://www.genome.jp/kegg-bin/show_pathway?hsa01212/hsa:51102%09red/hsa:54995%09red/hsa:2182%09red
Type II diabetes mellitus	KEGG PATHWAY	hsa04930	3	48	0.276207	0.684994	MAPK8|SOCS2|PKM	http://www.genome.jp/kegg-bin/show_pathway?hsa04930/hsa:5315%09red/hsa:8835%09red/hsa:5599%09red
Fc gamma R-mediated phagocytosis	KEGG PATHWAY	hsa04666	5	93	0.280717	0.684994	PLA2G6|AKT1|RAC1|PAK1|GSN	http://www.genome.jp/kegg-bin/show_pathway?hsa04666/hsa:2934%09red/hsa:5058%09red/hsa:207%09red/hsa:5879%09red/hsa:8398%09red
Glyoxylate and dicarboxylate metabolism	KEGG PATHWAY	hsa00630	2	28	0.289447	0.684994	PCCA|AFMID	http://www.genome.jp/kegg-bin/show_pathway?hsa00630/hsa:125061%09red/hsa:5095%09red
Leukocyte transendothelial migration	KEGG PATHWAY	hsa04670	6	118	0.294215	0.684994	ACTN1|PTK2|RAC1|RAP1B|RHOA|MYL9	http://www.genome.jp/kegg-bin/show_pathway?hsa04670/hsa:5908%09red/hsa:5747%09red/hsa:87%09red/hsa:5879%09red/hsa:387%09red/hsa:10398%09red
Signaling pathways regulating pluripotency of stem cells	KEGG PATHWAY	hsa04550	7	142	0.297486	0.684994	PCGF1|PCGF3|PCGF5|TCF3|HRAS|AKT1|BMPR2	http://www.genome.jp/kegg-bin/show_pathway?hsa04550/hsa:659%09red/hsa:6929%09red/hsa:84759%09red/hsa:10336%09red/hsa:3265%09red/hsa:84333%09red/hsa:207%09red
B cell receptor signaling pathway	KEGG PATHWAY	hsa04662	4	73	0.302919	0.684994	AKT1|HRAS|IKBKG|RAC1	http://www.genome.jp/kegg-bin/show_pathway?hsa04662/hsa:8517%09red/hsa:207%09red/hsa:5879%09red/hsa:3265%09red
Pancreatic secretion	KEGG PATHWAY	hsa04972	5	96	0.30312	0.684994	PLCB1|RHOA|RAP1B|ATP2B4|RAC1	http://www.genome.jp/kegg-bin/show_pathway?hsa04972/hsa:5908%09red/hsa:493%09red/hsa:5879%09red/hsa:23236%09red/hsa:387%09red
Hippo signaling pathway -multiple species	KEGG PATHWAY	hsa04392	2	29	0.303724	0.684994	CSNK1E|PAK1	http://www.genome.jp/kegg-bin/show_pathway?hsa04392/hsa:5058%09red/hsa:1454%09red
cGMP-PKG signaling pathway	KEGG PATHWAY	hsa04022	8	167	0.304705	0.684994	PLCB1|CALM3|CREB5|AKT1|MEF2D|RHOA|ATP2B4|MYL9	http://www.genome.jp/kegg-bin/show_pathway?hsa04022/hsa:9586%09red/hsa:808%09red/hsa:23236%09red/hsa:4209%09red/hsa:493%09red/hsa:207%09red/hsa:387%09red/hsa:10398%09red
Vascular smooth muscle contraction	KEGG PATHWAY	hsa04270	6	120	0.307626	0.684994	PLCB1|CALM3|PLA2G6|MYL6|RHOA|MYL9	http://www.genome.jp/kegg-bin/show_pathway?hsa04270/hsa:808%09red/hsa:23236%09red/hsa:4637%09red/hsa:8398%09red/hsa:387%09red/hsa:10398%09red
Arrhythmogenic right ventricular cardiomyopathy (ARVC)	KEGG PATHWAY	hsa05412	4	74	0.311605	0.684994	JUP|CACNB1|ACTN1|ITGB6	http://www.genome.jp/kegg-bin/show_pathway?hsa05412/hsa:3694%09red/hsa:87%09red/hsa:782%09red/hsa:3728%09red
Nicotinate and nicotinamide metabolism	KEGG PATHWAY	hsa00760	2	30	0.317949	0.684994	NADSYN1|NT5C3B	http://www.genome.jp/kegg-bin/show_pathway?hsa00760/hsa:55191%09red/hsa:115024%09red
Citrate cycle (TCA cycle)	KEGG PATHWAY	hsa00020	2	30	0.317949	0.684994	PCK2|IDH3B	http://www.genome.jp/kegg-bin/show_pathway?hsa00020/hsa:3420%09red/hsa:5106%09red
Glutathione metabolism	KEGG PATHWAY	hsa00480	3	52	0.318303	0.684994	GSTM4|GSR|RRM2B	http://www.genome.jp/kegg-bin/show_pathway?hsa00480/hsa:2948%09red/hsa:50484%09red/hsa:2936%09red
Biosynthesis of amino acids	KEGG PATHWAY	hsa01230	4	75	0.320315	0.684994	PYCR1|ENO3|IDH3B|PKM	http://www.genome.jp/kegg-bin/show_pathway?hsa01230/hsa:5315%09red/hsa:3420%09red/hsa:2027%09red/hsa:5831%09red
Pertussis	KEGG PATHWAY	hsa05133	4	75	0.320315	0.684994	IRF3|RHOA|MAPK8|CALM3	http://www.genome.jp/kegg-bin/show_pathway?hsa05133/hsa:3661%09red/hsa:808%09red/hsa:387%09red/hsa:5599%09red
Sulfur metabolism	KEGG PATHWAY	hsa00920	1	10	0.322191	0.684994	MPST	http://www.genome.jp/kegg-bin/show_pathway?hsa00920/hsa:4357%09red
Sulfur relay system	KEGG PATHWAY	hsa04122	1	10	0.322191	0.684994	MPST	http://www.genome.jp/kegg-bin/show_pathway?hsa04122/hsa:4357%09red
Lysosome	KEGG PATHWAY	hsa04142	6	123	0.327934	0.691395	GLA|AP4M1|CTSC|NAGA|AP1B1|GAA	http://www.genome.jp/kegg-bin/show_pathway?hsa04142/hsa:4668%09red/hsa:1075%09red/hsa:9179%09red/hsa:162%09red/hsa:2548%09red/hsa:2717%09red
Melanogenesis	KEGG PATHWAY	hsa04916	5	100	0.333386	0.69708	CAMK2D|PLCB1|HRAS|CALM3|MC1R	http://www.genome.jp/kegg-bin/show_pathway?hsa04916/hsa:817%09red/hsa:4157%09red/hsa:23236%09red/hsa:3265%09red/hsa:808%09red
RNA degradation	KEGG PATHWAY	hsa03018	4	77	0.337786	0.70049	CNOT1|ENO3|LSM7|C1D	http://www.genome.jp/kegg-bin/show_pathway?hsa03018/hsa:51690%09red/hsa:23019%09red/hsa:2027%09red/hsa:10438%09red
Adrenergic signaling in cardiomyocytes	KEGG PATHWAY	hsa04261	7	149	0.340734	0.700859	PLCB1|CALM3|CAMK2D|CACNB1|ATP2B4|AKT1|CREB5	http://www.genome.jp/kegg-bin/show_pathway?hsa04261/hsa:9586%09red/hsa:808%09red/hsa:782%09red/hsa:23236%09red/hsa:493%09red/hsa:817%09red/hsa:207%09red
RNA polymerase	KEGG PATHWAY	hsa03020	2	32	0.346177	0.706313	POLR1D|POLR3H	http://www.genome.jp/kegg-bin/show_pathway?hsa03020/hsa:171568%09red/hsa:51082%09red
HIF-1 signaling pathway	KEGG PATHWAY	hsa04066	5	103	0.356267	0.71147	CAMK2D|AKT1|CDKN1A|EIF4E2|ENO3	http://www.genome.jp/kegg-bin/show_pathway?hsa04066/hsa:207%09red/hsa:1026%09red/hsa:9470%09red/hsa:2027%09red/hsa:817%09red
Base excision repair	KEGG PATHWAY	hsa03410	2	33	0.360151	0.71147	SMUG1|POLE	http://www.genome.jp/kegg-bin/show_pathway?hsa03410/hsa:5426%09red/hsa:23583%09red
Non-small cell lung cancer	KEGG PATHWAY	hsa05223	3	56	0.360492	0.71147	AKT1|HRAS|STK4	http://www.genome.jp/kegg-bin/show_pathway?hsa05223/hsa:207%09red/hsa:6789%09red/hsa:3265%09red
Chagas disease (American trypanosomiasis)	KEGG PATHWAY	hsa05142	5	104	0.363912	0.71147	PLCB1|MAPK8|IKBKG|CASP8|AKT1	http://www.genome.jp/kegg-bin/show_pathway?hsa05142/hsa:207%09red/hsa:8517%09red/hsa:841%09red/hsa:23236%09red/hsa:5599%09red
Starch and sucrose metabolism	KEGG PATHWAY	hsa00500	3	57	0.370995	0.71147	GBE1|GAA|UXS1	http://www.genome.jp/kegg-bin/show_pathway?hsa00500/hsa:80146%09red/hsa:2632%09red/hsa:2548%09red
Aldosterone synthesis and secretion	KEGG PATHWAY	hsa04925	4	81	0.3728	0.71147	CAMK2D|PLCB1|CREB5|CALM3	http://www.genome.jp/kegg-bin/show_pathway?hsa04925/hsa:817%09red/hsa:23236%09red/hsa:9586%09red/hsa:808%09red
Tuberculosis	KEGG PATHWAY	hsa05152	8	179	0.373992	0.71147	CALM3|CAMK2D|RFX5|CASP8|AKT1|BAX|RHOA|MAPK8	http://www.genome.jp/kegg-bin/show_pathway?hsa05152/hsa:817%09red/hsa:581%09red/hsa:5599%09red/hsa:841%09red/hsa:808%09red/hsa:5993%09red/hsa:207%09red/hsa:387%09red
Alcoholism	KEGG PATHWAY	hsa05034	8	179	0.373992	0.71147	H2AFV|CALM3|HDAC6|HRAS|SHC3|CAMKK2|HDAC11|CREB5	http://www.genome.jp/kegg-bin/show_pathway?hsa05034/hsa:94239%09red/hsa:10013%09red/hsa:9586%09red/hsa:808%09red/hsa:79885%09red/hsa:53358%09red/hsa:3265%09red/hsa:10645%09red
SNARE interactions in vesicular transport	KEGG PATHWAY	hsa04130	2	34	0.374014	0.71147	VAMP3|STX2	http://www.genome.jp/kegg-bin/show_pathway?hsa04130/hsa:9341%09red/hsa:2054%09red
Proteoglycans in cancer	KEGG PATHWAY	hsa05205	9	205	0.380533	0.718469	CBLC|PTK2|RAC1|CAMK2D|HRAS|PAK1|AKT1|RHOA|CDKN1A	http://www.genome.jp/kegg-bin/show_pathway?hsa05205/hsa:1026%09red/hsa:817%09red/hsa:23624%09red/hsa:5747%09red/hsa:5058%09red/hsa:5879%09red/hsa:3265%09red/hsa:207%09red/hsa:387%09red
African trypanosomiasis	KEGG PATHWAY	hsa05143	2	35	0.387754	0.723727	PLCB1|APOL1	http://www.genome.jp/kegg-bin/show_pathway?hsa05143/hsa:8542%09red/hsa:23236%09red
Osteoclast differentiation	KEGG PATHWAY	hsa04380	6	132	0.389655	0.723727	RAC1|MAP3K7|PPARG|AKT1|IKBKG|MAPK8	http://www.genome.jp/kegg-bin/show_pathway?hsa04380/hsa:8517%09red/hsa:6885%09red/hsa:5599%09red/hsa:5879%09red/hsa:5468%09red/hsa:207%09red
Glycerolipid metabolism	KEGG PATHWAY	hsa00561	3	59	0.3919	0.723727	PNPLA2|AGPAT3|GLA	http://www.genome.jp/kegg-bin/show_pathway?hsa00561/hsa:56894%09red/hsa:57104%09red/hsa:2717%09red
DNA replication	KEGG PATHWAY	hsa03030	2	36	0.40136	0.731949	RFC4|POLE	http://www.genome.jp/kegg-bin/show_pathway?hsa03030/hsa:5426%09red/hsa:5984%09red
Insulin resistance	KEGG PATHWAY	hsa04931	5	109	0.402138	0.731949	PCK2|AKT1|PPP1R3E|MAPK8|CREB5	http://www.genome.jp/kegg-bin/show_pathway?hsa04931/hsa:207%09red/hsa:9586%09red/hsa:5599%09red/hsa:90673%09red/hsa:5106%09red
Rap1 signaling pathway	KEGG PATHWAY	hsa04015	9	211	0.413546	0.74295	PGF|PLCB1|CALM3|RAC1|HRAS|RAP1B|AKT1|RHOA|RALGDS	http://www.genome.jp/kegg-bin/show_pathway?hsa04015/hsa:5900%09red/hsa:5228%09red/hsa:5908%09red/hsa:808%09red/hsa:23236%09red/hsa:5879%09red/hsa:3265%09red/hsa:207%09red/hsa:387%09red
Primary immunodeficiency	KEGG PATHWAY	hsa05340	2	37	0.414823	0.74295	RFX5|IKBKG	http://www.genome.jp/kegg-bin/show_pathway?hsa05340/hsa:5993%09red/hsa:8517%09red
Cholinergic synapse	KEGG PATHWAY	hsa04725	5	111	0.417376	0.74295	CAMK2D|PLCB1|HRAS|CREB5|AKT1	http://www.genome.jp/kegg-bin/show_pathway?hsa04725/hsa:817%09red/hsa:9586%09red/hsa:207%09red/hsa:23236%09red/hsa:3265%09red
Folate biosynthesis	KEGG PATHWAY	hsa00790	1	14	0.419928	0.74295	DHFR	http://www.genome.jp/kegg-bin/show_pathway?hsa00790/hsa:1719%09red
Ribosome	KEGG PATHWAY	hsa03010	6	137	0.424022	0.744983	RPS24|RPL26L1|MRPS6|RPL32|RPL23|RPL29	http://www.genome.jp/kegg-bin/show_pathway?hsa03010/hsa:64968%09red/hsa:6229%09red/hsa:6159%09red/hsa:6161%09red/hsa:9349%09red/hsa:51121%09red
Glycosaminoglycan biosynthesis - keratan sulfate	KEGG PATHWAY	hsa00533	1	15	0.442083	0.762934	B4GALT2	http://www.genome.jp/kegg-bin/show_pathway?hsa00533/hsa:8704%09red
Glycosphingolipid biosynthesis - ganglio series	KEGG PATHWAY	hsa00604	1	15	0.442083	0.762934	ST6GALNAC3	http://www.genome.jp/kegg-bin/show_pathway?hsa00604/hsa:256435%09red
Longevity regulating pathway - multiple species	KEGG PATHWAY	hsa04213	3	64	0.443286	0.762934	AKT1|HRAS|AKT1S1	http://www.genome.jp/kegg-bin/show_pathway?hsa04213/hsa:207%09red/hsa:84335%09red/hsa:3265%09red
Tryptophan metabolism	KEGG PATHWAY	hsa00380	2	40	0.454266	0.776549	CYP1A1|AFMID	http://www.genome.jp/kegg-bin/show_pathway?hsa00380/hsa:125061%09red/hsa:1543%09red
Aminoacyl-tRNA biosynthesis	KEGG PATHWAY	hsa00970	3	66	0.463377	0.786808	SARS2|HARS|WARS	http://www.genome.jp/kegg-bin/show_pathway?hsa00970/hsa:54938%09red/hsa:7453%09red/hsa:3035%09red
Bladder cancer	KEGG PATHWAY	hsa05219	2	41	0.467075	0.7878	HRAS|CDKN1A	http://www.genome.jp/kegg-bin/show_pathway?hsa05219/hsa:1026%09red/hsa:3265%09red
Amphetamine addiction	KEGG PATHWAY	hsa05031	3	67	0.473305	0.787804	CAMK2D|CREB5|CALM3	http://www.genome.jp/kegg-bin/show_pathway?hsa05031/hsa:817%09red/hsa:9586%09red/hsa:808%09red
Glycolysis / Gluconeogenesis	KEGG PATHWAY	hsa00010	3	67	0.473305	0.787804	PCK2|ENO3|PKM	http://www.genome.jp/kegg-bin/show_pathway?hsa00010/hsa:5315%09red/hsa:2027%09red/hsa:5106%09red
Porphyrin and chlorophyll metabolism	KEGG PATHWAY	hsa00860	2	42	0.479705	0.793237	HEPH|HCCS	http://www.genome.jp/kegg-bin/show_pathway?hsa00860/hsa:9843%09red/hsa:3052%09red
Selenocompound metabolism	KEGG PATHWAY	hsa00450	1	17	0.483896	0.794972	TXNRD2	http://www.genome.jp/kegg-bin/show_pathway?hsa00450/hsa:10587%09red
Circadian entrainment	KEGG PATHWAY	hsa04713	4	95	0.492694	0.795529	CAMK2D|PLCB1|PER1|CALM3	http://www.genome.jp/kegg-bin/show_pathway?hsa04713/hsa:808%09red/hsa:817%09red/hsa:23236%09red/hsa:5187%09red
2-Oxocarboxylic acid metabolism	KEGG PATHWAY	hsa01210	1	18	0.503617	0.795529	IDH3B	http://www.genome.jp/kegg-bin/show_pathway?hsa01210/hsa:3420%09red
Proteasome	KEGG PATHWAY	hsa03050	2	44	0.504406	0.795529	PSMF1|PSME3	http://www.genome.jp/kegg-bin/show_pathway?hsa03050/hsa:9491%09red/hsa:10197%09red
Influenza A	KEGG PATHWAY	hsa05164	7	176	0.509528	0.795529	XPO1|IRF3|AKT1|TMPRSS4|TMPRSS13|PML|MAPK8	http://www.genome.jp/kegg-bin/show_pathway?hsa05164/hsa:3661%09red/hsa:56649%09red/hsa:5371%09red/hsa:84000%09red/hsa:5599%09red/hsa:207%09red/hsa:7514%09red
Thyroid hormone synthesis	KEGG PATHWAY	hsa04918	3	71	0.512142	0.795529	PLCB1|CREB5|GSR	http://www.genome.jp/kegg-bin/show_pathway?hsa04918/hsa:2936%09red/hsa:23236%09red/hsa:9586%09red
Melanoma	KEGG PATHWAY	hsa05218	3	71	0.512142	0.795529	AKT1|HRAS|CDKN1A	http://www.genome.jp/kegg-bin/show_pathway?hsa05218/hsa:1026%09red/hsa:207%09red/hsa:3265%09red
Ether lipid metabolism	KEGG PATHWAY	hsa00565	2	45	0.51647	0.795529	PLA2G6|PLD3	http://www.genome.jp/kegg-bin/show_pathway?hsa00565/hsa:23646%09red/hsa:8398%09red
Cysteine and methionine metabolism	KEGG PATHWAY	hsa00270	2	45	0.51647	0.795529	MPST|MRI1	http://www.genome.jp/kegg-bin/show_pathway?hsa00270/hsa:84245%09red/hsa:4357%09red
Non-alcoholic fatty liver disease (NAFLD)	KEGG PATHWAY	hsa04932	6	151	0.518121	0.795529	NDUFV1|RAC1|BAX|AKT1|CASP8|MAPK8	http://www.genome.jp/kegg-bin/show_pathway?hsa04932/hsa:581%09red/hsa:5599%09red/hsa:4723%09red/hsa:841%09red/hsa:5879%09red/hsa:207%09red
PPAR signaling pathway	KEGG PATHWAY	hsa03320	3	72	0.521615	0.795529	PCK2|PPARG|ACSL4	http://www.genome.jp/kegg-bin/show_pathway?hsa03320/hsa:5468%09red/hsa:5106%09red/hsa:2182%09red
Glycosaminoglycan degradation	KEGG PATHWAY	hsa00531	1	19	0.522586	0.795529	HYAL3	http://www.genome.jp/kegg-bin/show_pathway?hsa00531/hsa:8372%09red
Drug metabolism - other enzymes	KEGG PATHWAY	hsa00983	2	46	0.528339	0.795529	UCK1|NAT1	http://www.genome.jp/kegg-bin/show_pathway?hsa00983/hsa:83549%09red/hsa:9%09red
Carbohydrate digestion and absorption	KEGG PATHWAY	hsa04973	2	46	0.528339	0.795529	AKT1|SLC37A4	http://www.genome.jp/kegg-bin/show_pathway?hsa04973/hsa:207%09red/hsa:2542%09red
Hedgehog signaling pathway	KEGG PATHWAY	hsa04340	2	47	0.540009	0.795529	CSNK1E|GPR161	http://www.genome.jp/kegg-bin/show_pathway?hsa04340/hsa:23432%09red/hsa:1454%09red
Gastric acid secretion	KEGG PATHWAY	hsa04971	3	74	0.540257	0.795529	CAMK2D|PLCB1|CALM3	http://www.genome.jp/kegg-bin/show_pathway?hsa04971/hsa:817%09red/hsa:23236%09red/hsa:808%09red
Steroid biosynthesis	KEGG PATHWAY	hsa00100	1	20	0.540834	0.795529	EBP	http://www.genome.jp/kegg-bin/show_pathway?hsa00100/hsa:10682%09red
One carbon pool by folate	KEGG PATHWAY	hsa00670	1	20	0.540834	0.795529	DHFR	http://www.genome.jp/kegg-bin/show_pathway?hsa00670/hsa:1719%09red
Glycosaminoglycan biosynthesis - chondroitin sulfate / dermatan sulfate	KEGG PATHWAY	hsa00532	1	20	0.540834	0.795529	XYLT1	http://www.genome.jp/kegg-bin/show_pathway?hsa00532/hsa:64131%09red
N-Glycan biosynthesis	KEGG PATHWAY	hsa00510	2	49	0.562746	0.813884	ALG11|B4GALT2	http://www.genome.jp/kegg-bin/show_pathway?hsa00510/hsa:8704%09red/hsa:440138%09red
Intestinal immune network for IgA production	KEGG PATHWAY	hsa04672	2	49	0.562746	0.813884	ICOSLG|IL15RA	http://www.genome.jp/kegg-bin/show_pathway?hsa04672/hsa:3601%09red/hsa:23308%09red
Jak-STAT signaling pathway	KEGG PATHWAY	hsa04630	6	158	0.562963	0.813884	SOCS2|HRAS|AKT1|MCL1|IL15RA|CDKN1A	http://www.genome.jp/kegg-bin/show_pathway?hsa04630/hsa:3601%09red/hsa:1026%09red/hsa:4170%09red/hsa:8835%09red/hsa:3265%09red/hsa:207%09red
Arginine and proline metabolism	KEGG PATHWAY	hsa00330	2	50	0.57381	0.824852	P4HA2|PYCR1	http://www.genome.jp/kegg-bin/show_pathway?hsa00330/hsa:5831%09red/hsa:8974%09red
Amyotrophic lateral sclerosis (ALS)	KEGG PATHWAY	hsa05014	2	51	0.58467	0.825358	BAX|RAC1	http://www.genome.jp/kegg-bin/show_pathway?hsa05014/hsa:5879%09red/hsa:581%09red
Mismatch repair	KEGG PATHWAY	hsa03430	1	23	0.59151	0.825358	RFC4	http://www.genome.jp/kegg-bin/show_pathway?hsa03430/hsa:5984%09red
Protein export	KEGG PATHWAY	hsa03060	1	23	0.59151	0.825358	IMMP1L	http://www.genome.jp/kegg-bin/show_pathway?hsa03060/hsa:196294%09red
Proximal tubule bicarbonate reclamation	KEGG PATHWAY	hsa04964	1	23	0.59151	0.825358	PCK2	http://www.genome.jp/kegg-bin/show_pathway?hsa04964/hsa:5106%09red
Mineral absorption	KEGG PATHWAY	hsa04978	2	52	0.595324	0.825358	HEPH|SLC26A6	http://www.genome.jp/kegg-bin/show_pathway?hsa04978/hsa:9843%09red/hsa:65010%09red
Endometrial cancer	KEGG PATHWAY	hsa05213	2	52	0.595324	0.825358	AKT1|HRAS	http://www.genome.jp/kegg-bin/show_pathway?hsa05213/hsa:207%09red/hsa:3265%09red
Measles	KEGG PATHWAY	hsa05162	5	136	0.596998	0.825358	IRF3|AKT1|BBC3|CD46|MAP3K7	http://www.genome.jp/kegg-bin/show_pathway?hsa05162/hsa:27113%09red/hsa:207%09red/hsa:6885%09red/hsa:3661%09red/hsa:4179%09red
Glycosaminoglycan biosynthesis - heparan sulfate / heparin	KEGG PATHWAY	hsa00534	1	24	0.607132	0.825964	XYLT1	http://www.genome.jp/kegg-bin/show_pathway?hsa00534/hsa:64131%09red
Chemical carcinogenesis	KEGG PATHWAY	hsa05204	3	82	0.610458	0.825964	CYP1A1|NAT1|GSTM4	http://www.genome.jp/kegg-bin/show_pathway?hsa05204/hsa:2948%09red/hsa:9%09red/hsa:1543%09red
Fatty acid elongation	KEGG PATHWAY	hsa00062	1	25	0.622159	0.825964	MECR	http://www.genome.jp/kegg-bin/show_pathway?hsa00062/hsa:51102%09red
alpha-Linolenic acid metabolism	KEGG PATHWAY	hsa00592	1	25	0.622159	0.825964	PLA2G6	http://www.genome.jp/kegg-bin/show_pathway?hsa00592/hsa:8398%09red
Alzheimer's disease	KEGG PATHWAY	hsa05010	6	168	0.623383	0.825964	PLCB1|APH1A|CALM3|NDUFV1|CASP8|ATP5D	http://www.genome.jp/kegg-bin/show_pathway?hsa05010/hsa:808%09red/hsa:23236%09red/hsa:4723%09red/hsa:841%09red/hsa:51107%09red/hsa:513%09red
Pathogenic Escherichia coli infection	KEGG PATHWAY	hsa05130	2	55	0.626058	0.825964	RHOA|NCK2	http://www.genome.jp/kegg-bin/show_pathway?hsa05130/hsa:8440%09red/hsa:387%09red
Legionellosis	KEGG PATHWAY	hsa05134	2	55	0.626058	0.825964	SAR1A|CASP8	http://www.genome.jp/kegg-bin/show_pathway?hsa05134/hsa:56681%09red/hsa:841%09red
TGF-beta signaling pathway	KEGG PATHWAY	hsa04350	3	84	0.626853	0.825964	RHOA|BMPR2|E2F5	http://www.genome.jp/kegg-bin/show_pathway?hsa04350/hsa:659%09red/hsa:387%09red/hsa:1875%09red
Carbon metabolism	KEGG PATHWAY	hsa01200	4	113	0.630603	0.825964	PCCA|ENO3|IDH3B|PKM	http://www.genome.jp/kegg-bin/show_pathway?hsa01200/hsa:5315%09red/hsa:3420%09red/hsa:5095%09red/hsa:2027%09red
Insulin secretion	KEGG PATHWAY	hsa04911	3	85	0.634871	0.825964	CAMK2D|PLCB1|CREB5	http://www.genome.jp/kegg-bin/show_pathway?hsa04911/hsa:817%09red/hsa:23236%09red/hsa:9586%09red
Regulation of lipolysis in adipocytes	KEGG PATHWAY	hsa04923	2	56	0.635894	0.825964	PNPLA2|AKT1	http://www.genome.jp/kegg-bin/show_pathway?hsa04923/hsa:207%09red/hsa:57104%09red
Maturity onset diabetes of the young	KEGG PATHWAY	hsa04950	1	26	0.636612	0.825964	HNF1B	http://www.genome.jp/kegg-bin/show_pathway?hsa04950/hsa:6928%09red
Phototransduction	KEGG PATHWAY	hsa04744	1	27	0.650515	0.835433	CALM3	http://www.genome.jp/kegg-bin/show_pathway?hsa04744/hsa:808%09red
Collecting duct acid secretion	KEGG PATHWAY	hsa04966	1	27	0.650515	0.835433	ATP6V1F	http://www.genome.jp/kegg-bin/show_pathway?hsa04966/hsa:9296%09red
Salivary secretion	KEGG PATHWAY	hsa04970	3	89	0.665741	0.847614	PLCB1|ATP2B4|CALM3	http://www.genome.jp/kegg-bin/show_pathway?hsa04970/hsa:493%09red/hsa:23236%09red/hsa:808%09red
Viral myocarditis	KEGG PATHWAY	hsa05416	2	60	0.673218	0.847614	CASP8|RAC1	http://www.genome.jp/kegg-bin/show_pathway?hsa05416/hsa:841%09red/hsa:5879%09red
Long-term depression	KEGG PATHWAY	hsa04730	2	60	0.673218	0.847614	PLCB1|HRAS	http://www.genome.jp/kegg-bin/show_pathway?hsa04730/hsa:23236%09red/hsa:3265%09red
Linoleic acid metabolism	KEGG PATHWAY	hsa00591	1	29	0.676751	0.847614	PLA2G6	http://www.genome.jp/kegg-bin/show_pathway?hsa00591/hsa:8398%09red
Homologous recombination	KEGG PATHWAY	hsa03440	1	29	0.676751	0.847614	MRE11A	http://www.genome.jp/kegg-bin/show_pathway?hsa03440/hsa:4361%09red
mRNA surveillance pathway	KEGG PATHWAY	hsa03015	3	92	0.687624	0.855573	PCF11|DAZAP1|NCBP2	http://www.genome.jp/kegg-bin/show_pathway?hsa03015/hsa:26528%09red/hsa:51585%09red/hsa:22916%09red
Platelet activation	KEGG PATHWAY	hsa04611	4	122	0.689869	0.855573	PLCB1|RHOA|RAP1B|AKT1	http://www.genome.jp/kegg-bin/show_pathway?hsa04611/hsa:5908%09red/hsa:207%09red/hsa:23236%09red/hsa:387%09red
NF-kappa B signaling pathway	KEGG PATHWAY	hsa04064	3	93	0.694676	0.857332	UBE2I|MAP3K7|IKBKG	http://www.genome.jp/kegg-bin/show_pathway?hsa04064/hsa:8517%09red/hsa:6885%09red/hsa:7329%09red
Other types of O-glycan biosynthesis	KEGG PATHWAY	hsa00514	1	31	0.701024	0.860428	B4GALT2	http://www.genome.jp/kegg-bin/show_pathway?hsa00514/hsa:8704%09red
Hippo signaling pathway	KEGG PATHWAY	hsa04390	5	154	0.705134	0.860428	LLGL2|BBC3|CSNK1E|BMPR2|BIRC5	http://www.genome.jp/kegg-bin/show_pathway?hsa04390/hsa:332%09red/hsa:659%09red/hsa:3993%09red/hsa:1454%09red/hsa:27113%09red
Renin secretion	KEGG PATHWAY	hsa04924	2	64	0.707387	0.860428	PLCB1|CALM3	http://www.genome.jp/kegg-bin/show_pathway?hsa04924/hsa:808%09red/hsa:23236%09red
Propanoate metabolism	KEGG PATHWAY	hsa00640	1	32	0.712471	0.861949	PCCA	http://www.genome.jp/kegg-bin/show_pathway?hsa00640/hsa:5095%09red
Retinol metabolism	KEGG PATHWAY	hsa00830	2	65	0.715452	0.861949	CYP1A1|DHRS4	http://www.genome.jp/kegg-bin/show_pathway?hsa00830/hsa:10901%09red/hsa:1543%09red
Phosphatidylinositol signaling system	KEGG PATHWAY	hsa04070	3	98	0.728144	0.873083	PLCB1|PI4KB|CALM3	http://www.genome.jp/kegg-bin/show_pathway?hsa04070/hsa:5298%09red/hsa:808%09red/hsa:23236%09red
Prion diseases	KEGG PATHWAY	hsa05020	1	35	0.744257	0.884023	BAX	http://www.genome.jp/kegg-bin/show_pathway?hsa05020/hsa:581%09red
Alanine, aspartate and glutamate metabolism	KEGG PATHWAY	hsa00250	1	35	0.744257	0.884023	ASNS	http://www.genome.jp/kegg-bin/show_pathway?hsa00250/hsa:440%09red
Inositol phosphate metabolism	KEGG PATHWAY	hsa00562	2	71	0.760003	0.896131	PLCB1|PI4KB	http://www.genome.jp/kegg-bin/show_pathway?hsa00562/hsa:5298%09red/hsa:23236%09red
Natural killer cell mediated cytotoxicity	KEGG PATHWAY	hsa04650	4	135	0.763087	0.896131	HRAS|SHC3|PAK1|RAC1	http://www.genome.jp/kegg-bin/show_pathway?hsa04650/hsa:5058%09red/hsa:5879%09red/hsa:3265%09red/hsa:53358%09red
Protein processing in endoplasmic reticulum	KEGG PATHWAY	hsa04141	5	166	0.765076	0.896131	SAR1A|MAPK8|SSR4|UBE2D3|BAX	http://www.genome.jp/kegg-bin/show_pathway?hsa04141/hsa:56681%09red/hsa:6748%09red/hsa:7323%09red/hsa:5599%09red/hsa:581%09red
Metabolism of xenobiotics by cytochrome P450	KEGG PATHWAY	hsa00980	2	73	0.773457	0.901773	CYP1A1|GSTM4	http://www.genome.jp/kegg-bin/show_pathway?hsa00980/hsa:2948%09red/hsa:1543%09red
Antigen processing and presentation	KEGG PATHWAY	hsa04612	2	78	0.804252	0.929625	RFX5|PSME3	http://www.genome.jp/kegg-bin/show_pathway?hsa04612/hsa:5993%09red/hsa:10197%09red
Complement and coagulation cascades	KEGG PATHWAY	hsa04610	2	79	0.809947	0.929625	F12|CD46	http://www.genome.jp/kegg-bin/show_pathway?hsa04610/hsa:2161%09red/hsa:4179%09red
Fatty acid degradation	KEGG PATHWAY	hsa00071	1	44	0.820097	0.929625	ACSL4	http://www.genome.jp/kegg-bin/show_pathway?hsa00071/hsa:2182%09red
Vasopressin-regulated water reabsorption	KEGG PATHWAY	hsa04962	1	44	0.820097	0.929625	CREB5	http://www.genome.jp/kegg-bin/show_pathway?hsa04962/hsa:9586%09red
Calcium signaling pathway	KEGG PATHWAY	hsa04020	5	180	0.822858	0.929625	CAMK2D|PLCB1|ATP2B4|LTB4R2|CALM3	http://www.genome.jp/kegg-bin/show_pathway?hsa04020/hsa:808%09red/hsa:493%09red/hsa:56413%09red/hsa:23236%09red/hsa:817%09red
Basal transcription factors	KEGG PATHWAY	hsa03022	1	45	0.826997	0.929625	GTF2H2C	http://www.genome.jp/kegg-bin/show_pathway?hsa03022/hsa:728340%09red
Hypertrophic cardiomyopathy (HCM)	KEGG PATHWAY	hsa05410	2	83	0.831281	0.929625	CACNB1|ITGB6	http://www.genome.jp/kegg-bin/show_pathway?hsa05410/hsa:3694%09red/hsa:782%09red
Ribosome biogenesis in eukaryotes	KEGG PATHWAY	hsa03008	2	84	0.836267	0.929625	XPO1|TBL3	http://www.genome.jp/kegg-bin/show_pathway?hsa03008/hsa:7514%09red/hsa:10607%09red
Sphingolipid metabolism	KEGG PATHWAY	hsa00600	1	47	0.840018	0.929625	GLA	http://www.genome.jp/kegg-bin/show_pathway?hsa00600/hsa:2717%09red
Salmonella infection	KEGG PATHWAY	hsa05132	2	86	0.845842	0.929625	MAPK8|RAC1	http://www.genome.jp/kegg-bin/show_pathway?hsa05132/hsa:5879%09red/hsa:5599%09red
Valine, leucine and isoleucine degradation	KEGG PATHWAY	hsa00280	1	48	0.846157	0.929625	PCCA	http://www.genome.jp/kegg-bin/show_pathway?hsa00280/hsa:5095%09red
Amino sugar and nucleotide sugar metabolism	KEGG PATHWAY	hsa00520	1	48	0.846157	0.929625	UXS1	http://www.genome.jp/kegg-bin/show_pathway?hsa00520/hsa:80146%09red
Cocaine addiction	KEGG PATHWAY	hsa05030	1	49	0.852061	0.929625	CREB5	http://www.genome.jp/kegg-bin/show_pathway?hsa05030/hsa:9586%09red
Gap junction	KEGG PATHWAY	hsa04540	2	88	0.854908	0.929625	PLCB1|HRAS	http://www.genome.jp/kegg-bin/show_pathway?hsa04540/hsa:23236%09red/hsa:3265%09red
Ovarian steroidogenesis	KEGG PATHWAY	hsa04913	1	50	0.85774	0.929625	CYP1A1	http://www.genome.jp/kegg-bin/show_pathway?hsa04913/hsa:1543%09red
Vibrio cholerae infection	KEGG PATHWAY	hsa05110	1	51	0.863201	0.929625	ATP6V1F	http://www.genome.jp/kegg-bin/show_pathway?hsa05110/hsa:9296%09red
Dilated cardiomyopathy	KEGG PATHWAY	hsa05414	2	90	0.863486	0.929625	CACNB1|ITGB6	http://www.genome.jp/kegg-bin/show_pathway?hsa05414/hsa:3694%09red/hsa:782%09red
Protein digestion and absorption	KEGG PATHWAY	hsa04974	2	90	0.863486	0.929625	SLC1A5|COL4A2	http://www.genome.jp/kegg-bin/show_pathway?hsa04974/hsa:6510%09red/hsa:1284%09red
Oxidative phosphorylation	KEGG PATHWAY	hsa00190	3	133	0.888166	0.952144	NDUFV1|ATP6V1F|ATP5D	http://www.genome.jp/kegg-bin/show_pathway?hsa00190/hsa:4723%09red/hsa:9296%09red/hsa:513%09red
Steroid hormone biosynthesis	KEGG PATHWAY	hsa00140	1	58	0.896007	0.956497	CYP1A1	http://www.genome.jp/kegg-bin/show_pathway?hsa00140/hsa:1543%09red
Retrograde endocannabinoid signaling	KEGG PATHWAY	hsa04723	2	101	0.902902	0.959808	PLCB1|MAPK8	http://www.genome.jp/kegg-bin/show_pathway?hsa04723/hsa:23236%09red/hsa:5599%09red
Arachidonic acid metabolism	KEGG PATHWAY	hsa00590	1	62	0.911099	0.964469	PLA2G6	http://www.genome.jp/kegg-bin/show_pathway?hsa00590/hsa:8398%09red
Cell adhesion molecules (CAMs)	KEGG PATHWAY	hsa04514	3	145	0.919544	0.969353	GLG1|ICOSLG|NLGN2	http://www.genome.jp/kegg-bin/show_pathway?hsa04514/hsa:2734%09red/hsa:57555%09red/hsa:23308%09red
Serotonergic synapse	KEGG PATHWAY	hsa04726	2	112	0.931509	0.974832	PLCB1|HRAS	http://www.genome.jp/kegg-bin/show_pathway?hsa04726/hsa:23236%09red/hsa:3265%09red
Drug metabolism - cytochrome P450	KEGG PATHWAY	hsa00982	1	69	0.932448	0.974832	GSTM4	http://www.genome.jp/kegg-bin/show_pathway?hsa00982/hsa:2948%09red
Phagosome	KEGG PATHWAY	hsa04145	3	155	0.939329	0.97533	VAMP3|ATP6V1F|RAC1	http://www.genome.jp/kegg-bin/show_pathway?hsa04145/hsa:9296%09red/hsa:9341%09red/hsa:5879%09red
MicroRNAs in cancer	KEGG PATHWAY	hsa05206	7	299	0.943631	0.97533	UBE2I|HRAS|HMGA2|BMPR2|MCL1|RHOA|CDKN1A	http://www.genome.jp/kegg-bin/show_pathway?hsa05206/hsa:1026%09red/hsa:4170%09red/hsa:659%09red/hsa:8091%09red/hsa:3265%09red/hsa:387%09red/hsa:7329%09red
Leishmaniasis	KEGG PATHWAY	hsa05140	1	74	0.94449	0.97533	MAP3K7	http://www.genome.jp/kegg-bin/show_pathway?hsa05140/hsa:6885%09red
Cardiac muscle contraction	KEGG PATHWAY	hsa04260	1	78	0.952563	0.979669	CACNB1	http://www.genome.jp/kegg-bin/show_pathway?hsa04260/hsa:782%09red
Systemic lupus erythematosus	KEGG PATHWAY	hsa05322	2	136	0.96876	0.99009	ACTN1|H2AFV	http://www.genome.jp/kegg-bin/show_pathway?hsa05322/hsa:94239%09red/hsa:87%09red
Rheumatoid arthritis	KEGG PATHWAY	hsa05323	1	91	0.971555	0.99009	ATP6V1F	http://www.genome.jp/kegg-bin/show_pathway?hsa05323/hsa:9296%09red
Parkinson's disease	KEGG PATHWAY	hsa05012	2	142	0.974437	0.99009	NDUFV1|ATP5D	http://www.genome.jp/kegg-bin/show_pathway?hsa05012/hsa:4723%09red/hsa:513%09red
Glutamatergic synapse	KEGG PATHWAY	hsa04724	1	114	0.988519	0.999999	PLCB1	http://www.genome.jp/kegg-bin/show_pathway?hsa04724/hsa:23236%09red
Neuroactive ligand-receptor interaction	KEGG PATHWAY	hsa04080	4	278	0.994715	0.999999	LTB4R2|LTB4R|TRPV1|MC1R	http://www.genome.jp/kegg-bin/show_pathway?hsa04080/hsa:7442%09red/hsa:1241%09red/hsa:56413%09red/hsa:4157%09red
Cytokine-cytokine receptor interaction	KEGG PATHWAY	hsa04060	3	265	0.998041	0.999999	BMPR2|IL15RA|TNFRSF19	http://www.genome.jp/kegg-bin/show_pathway?hsa04060/hsa:3601%09red/hsa:659%09red/hsa:55504%09red
Olfactory transduction	KEGG PATHWAY	hsa04740	2	417	0.999999	0.999999	CAMK2D|CALM3	http://www.genome.jp/kegg-bin/show_pathway?hsa04740/hsa:817%09red/hsa:808%09red
